# Supplementary material for: Thiourea dioxide with TBHP: a fruitful and greener recipe for the catalytic oxidation of alcohols
Source: Royal Society of Chemistry journal article supplement (doi:10.1039/c3ra21971b), 2013-01-01

## Supporting information:

### **Thiourea dioxide with TBHP: a fruitful and greener recipe for the catalytic oxidation of alcohols.**

*Sanny Verma,<sup>a</sup> Raghuvir Singh,<sup>b</sup> Deependra Tripathi,<sup>b</sup> Piyush Kumar, Gajendra Mohan Bahuguna<sup>b</sup> and Suman L. Jain<sup>\*a</sup>*

<sup>a</sup>*Chemical Sciences Division, CSIR-Indian Institute of Petroleum, Mohkampur, Dehradun-248005 (India)*

<sup>b</sup>*Analytical Sciences Division, CSIR-Indian Institute of Petroleum, Mohkampur, Dehradun-248005 (India)*

|                                                |               |
|------------------------------------------------|---------------|
| <b>1.1 IR Spectra of Thiourea dioxide.....</b> | <b>S-2</b>    |
| <b>Part II NMR Spectra of products.....</b>    | <b>S3-S14</b> |

## IR spectra of TUD

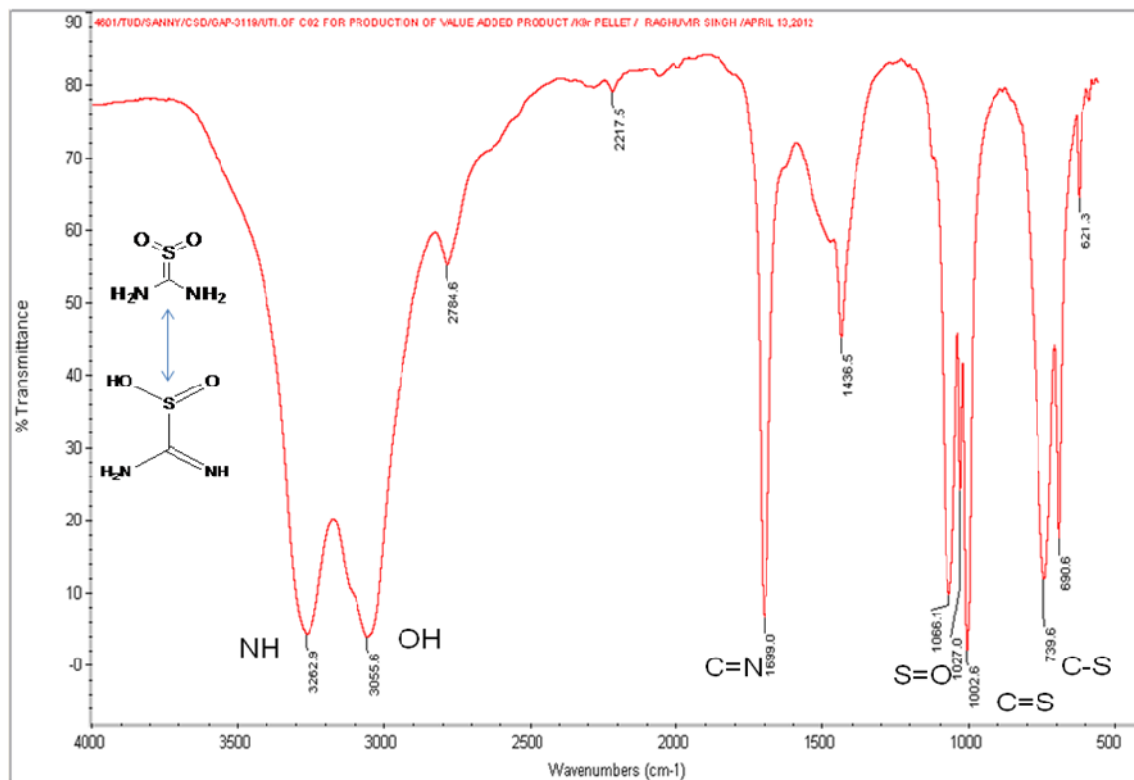

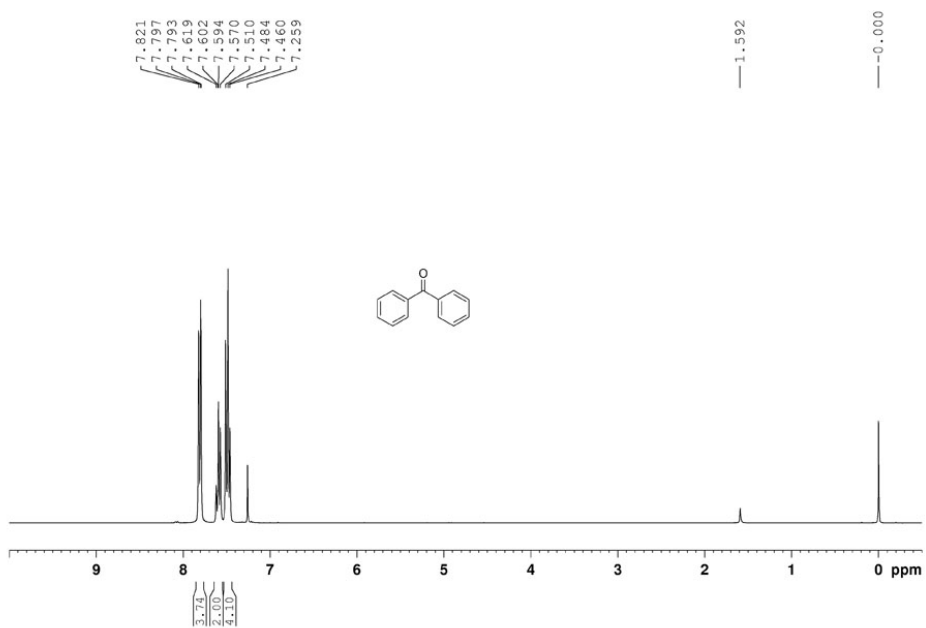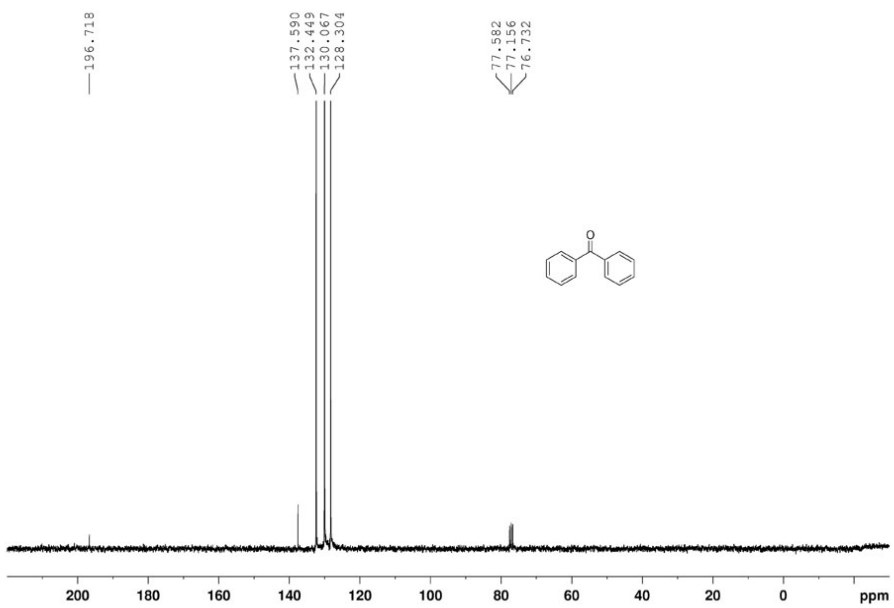

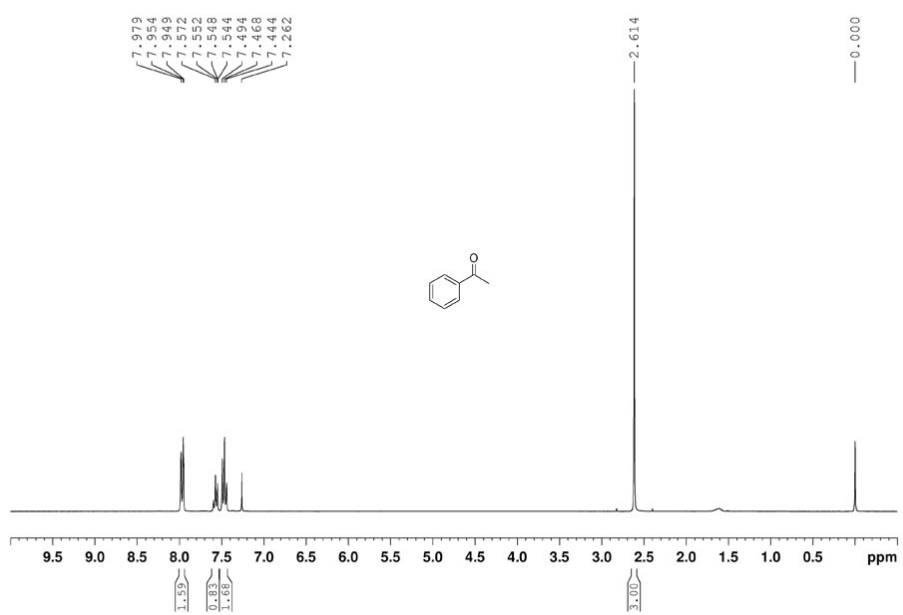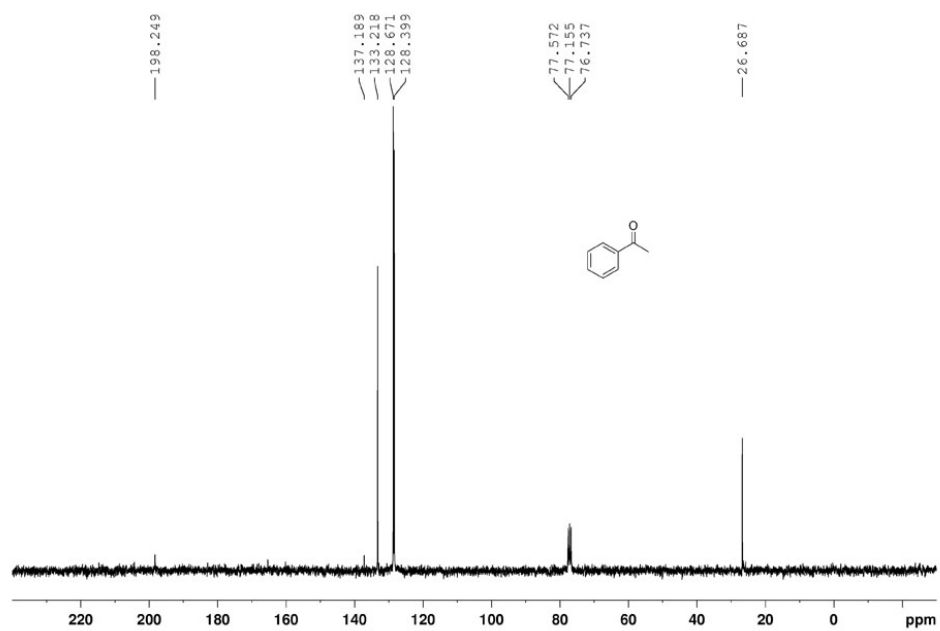



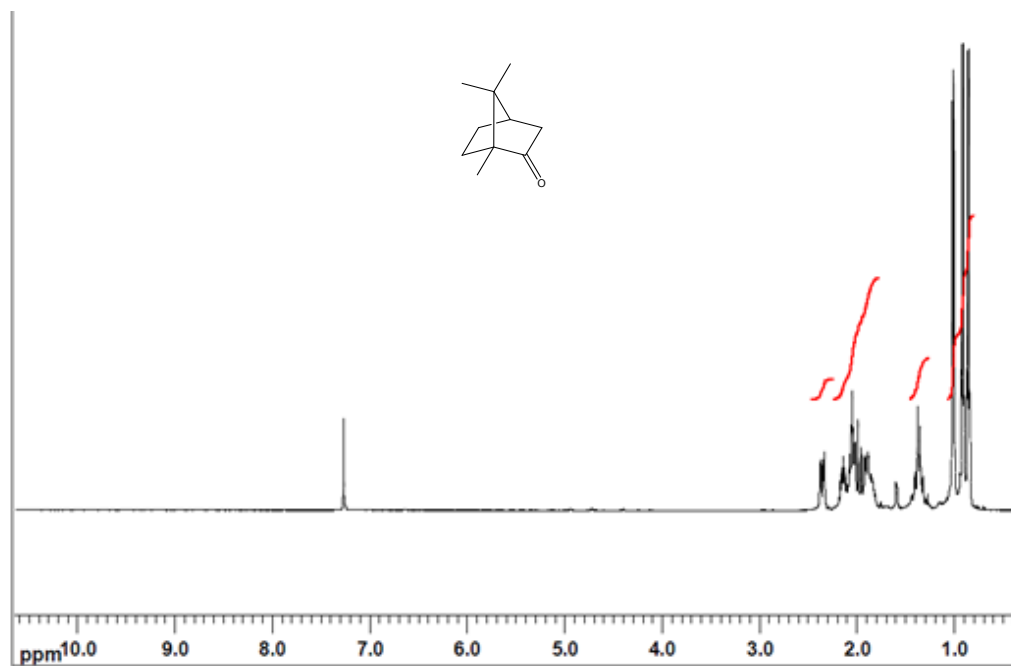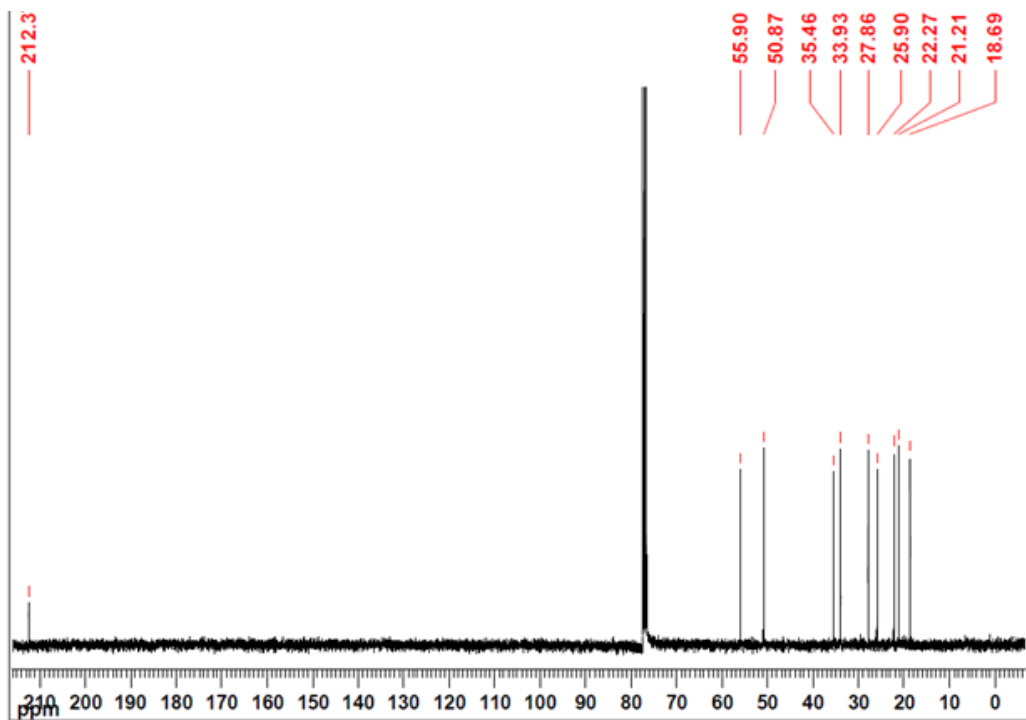

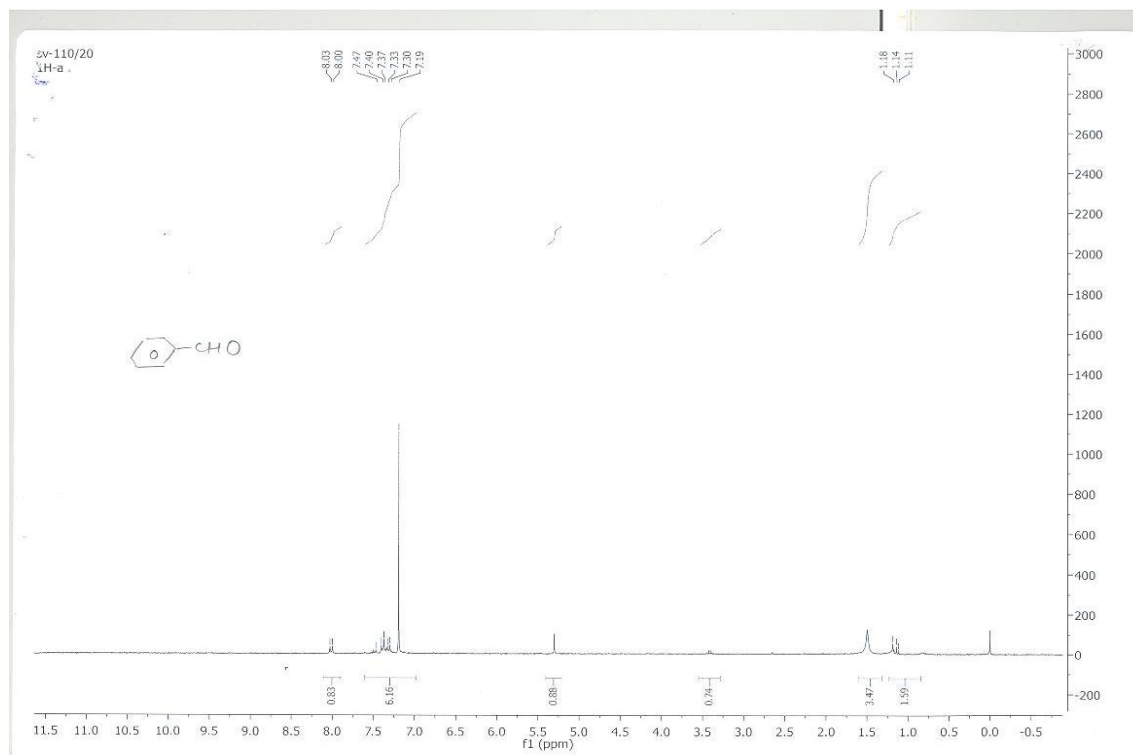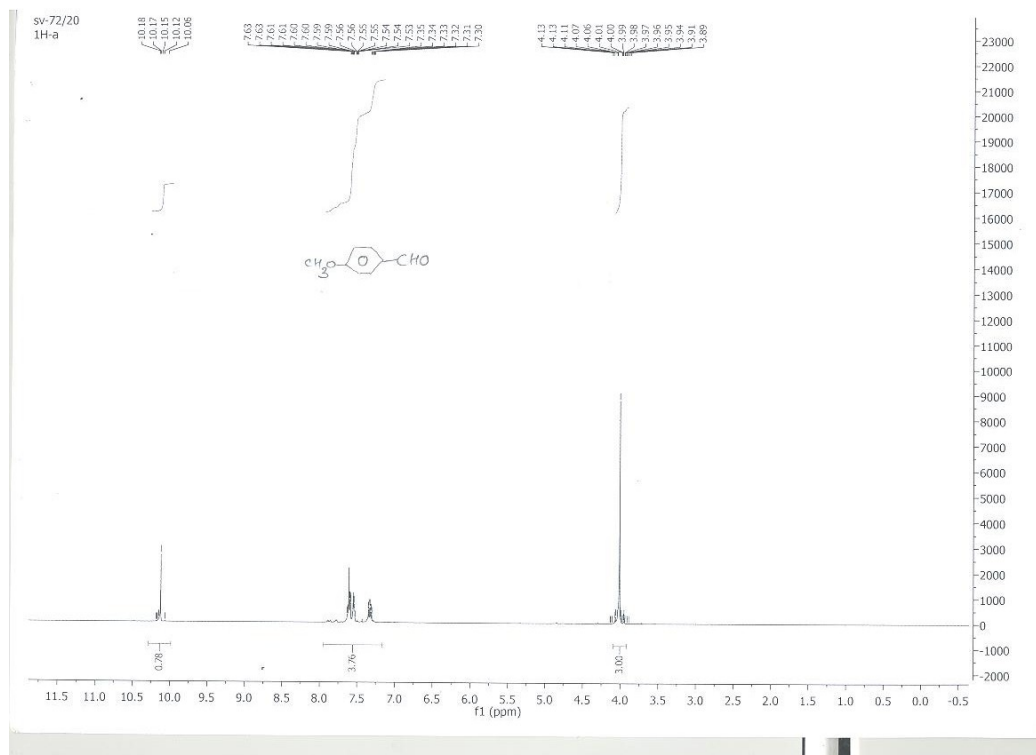

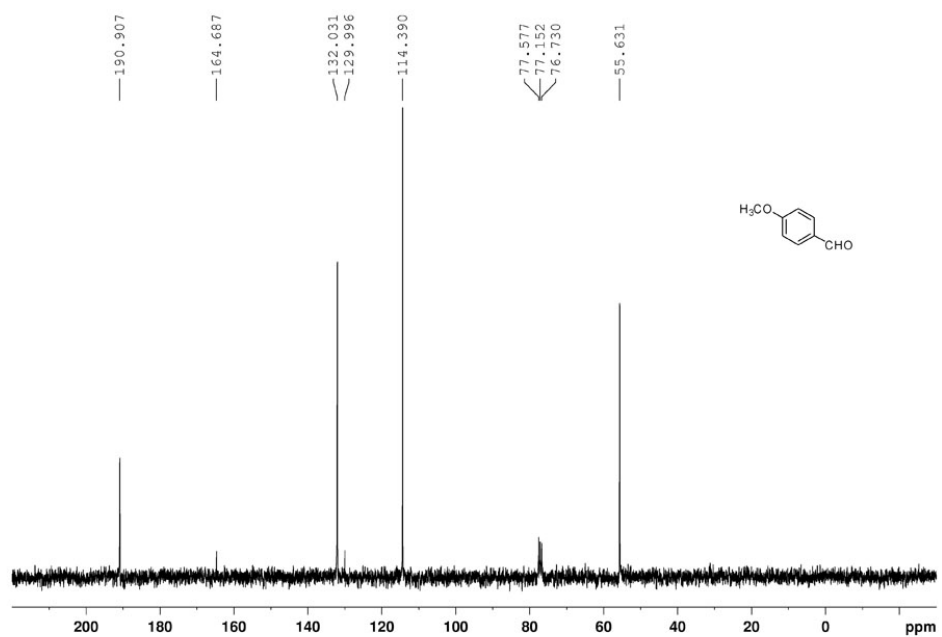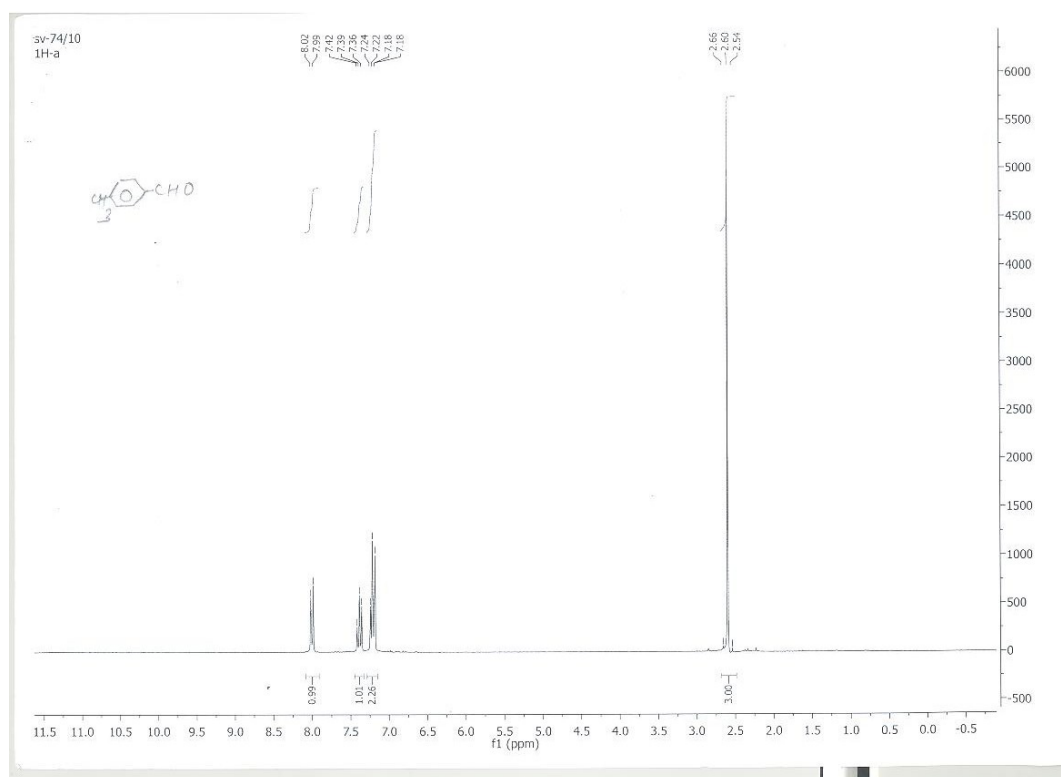



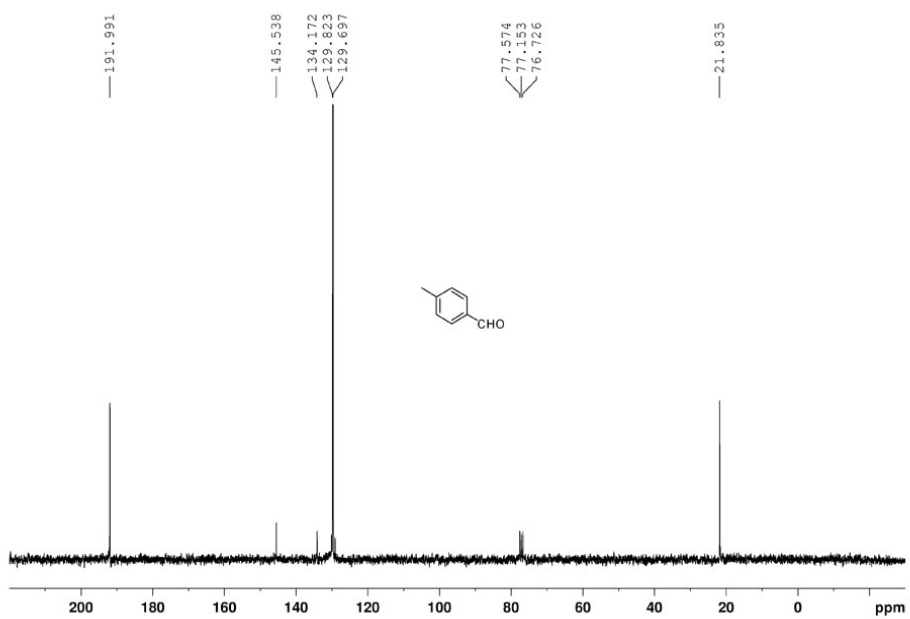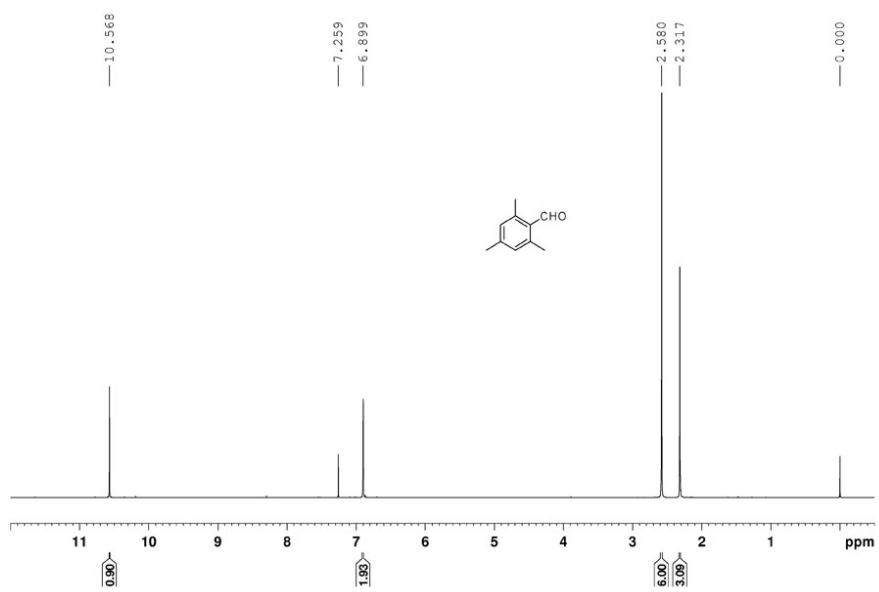

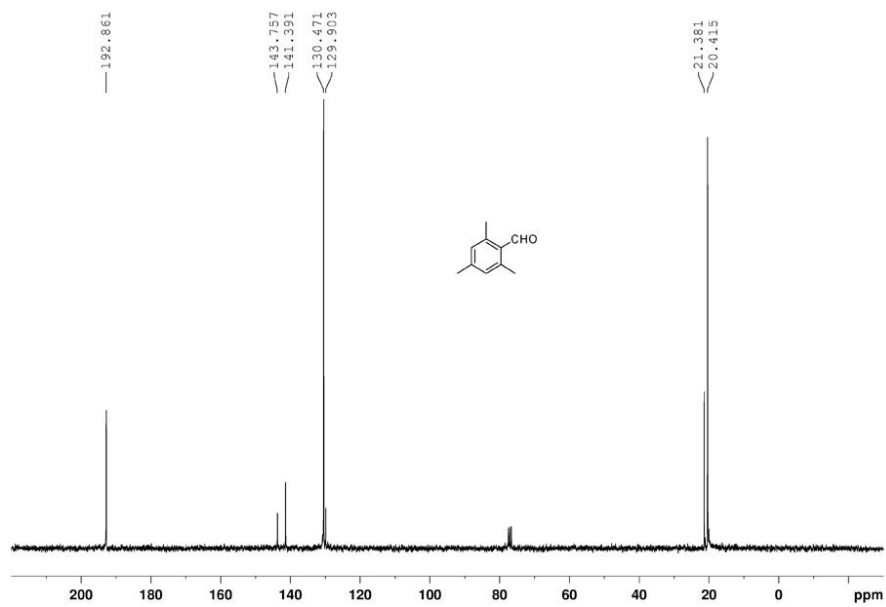

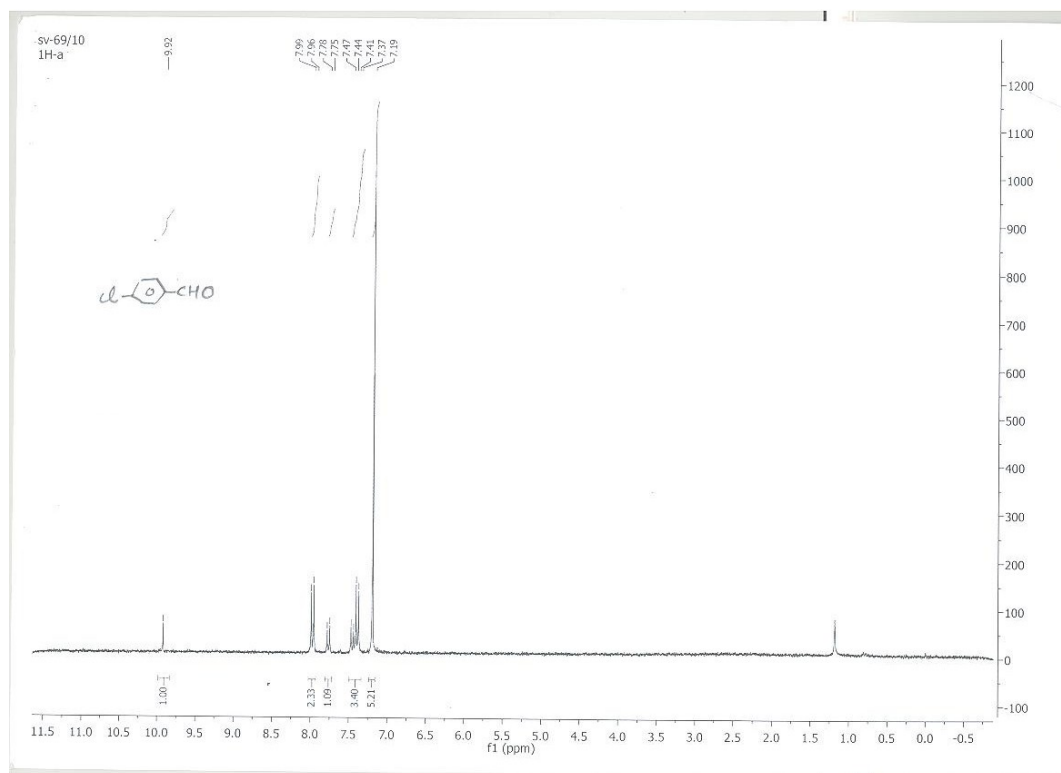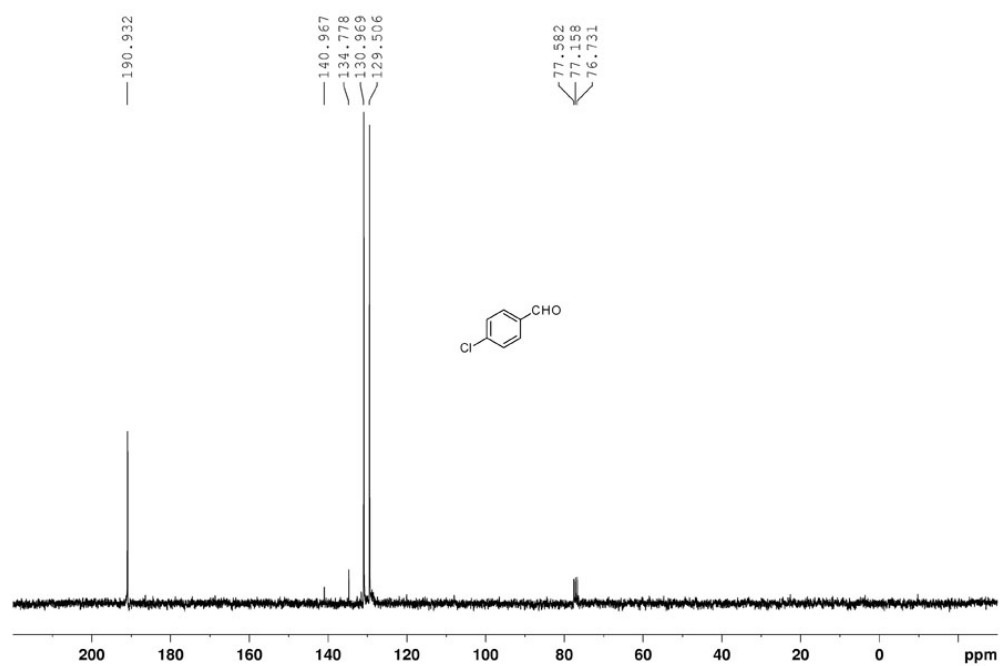

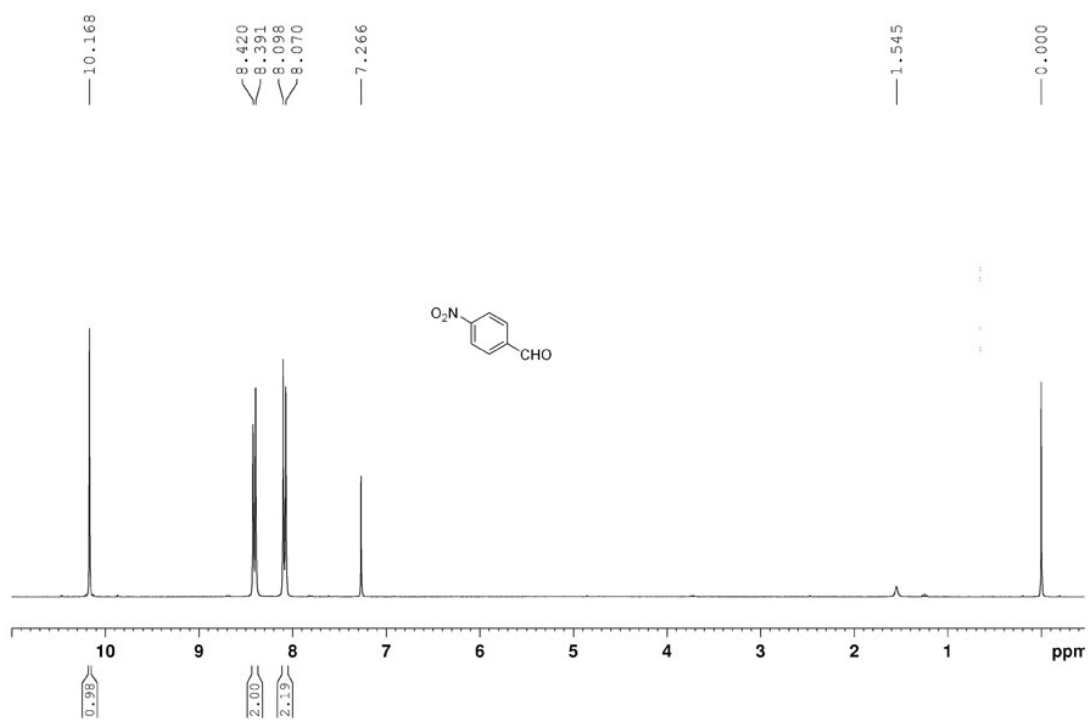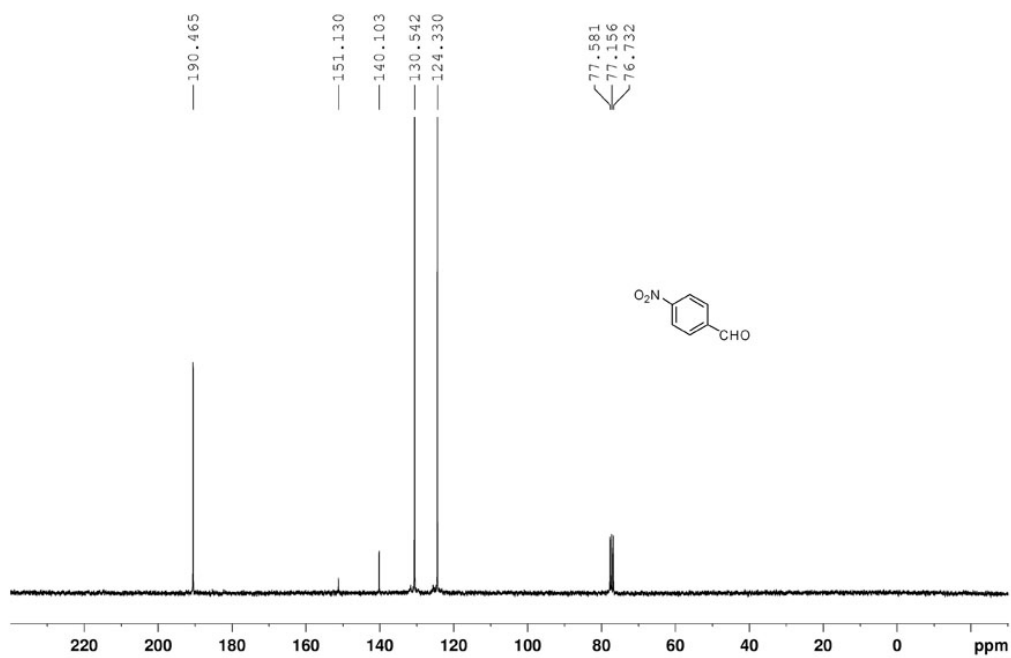

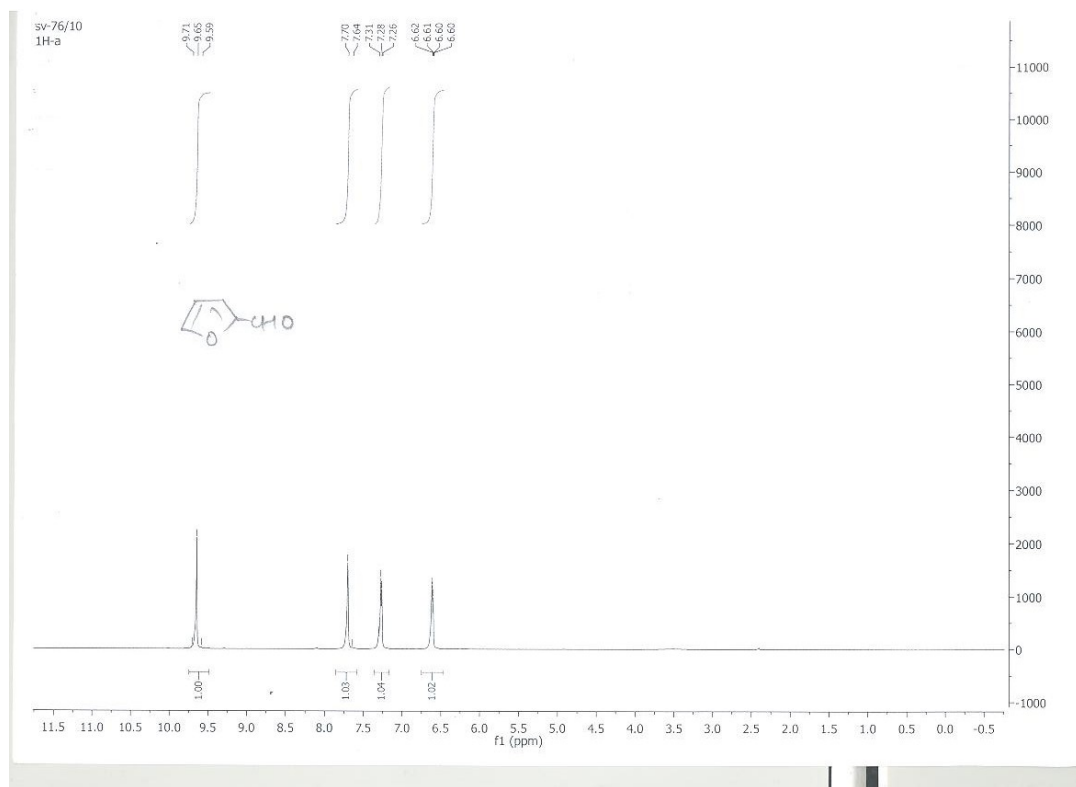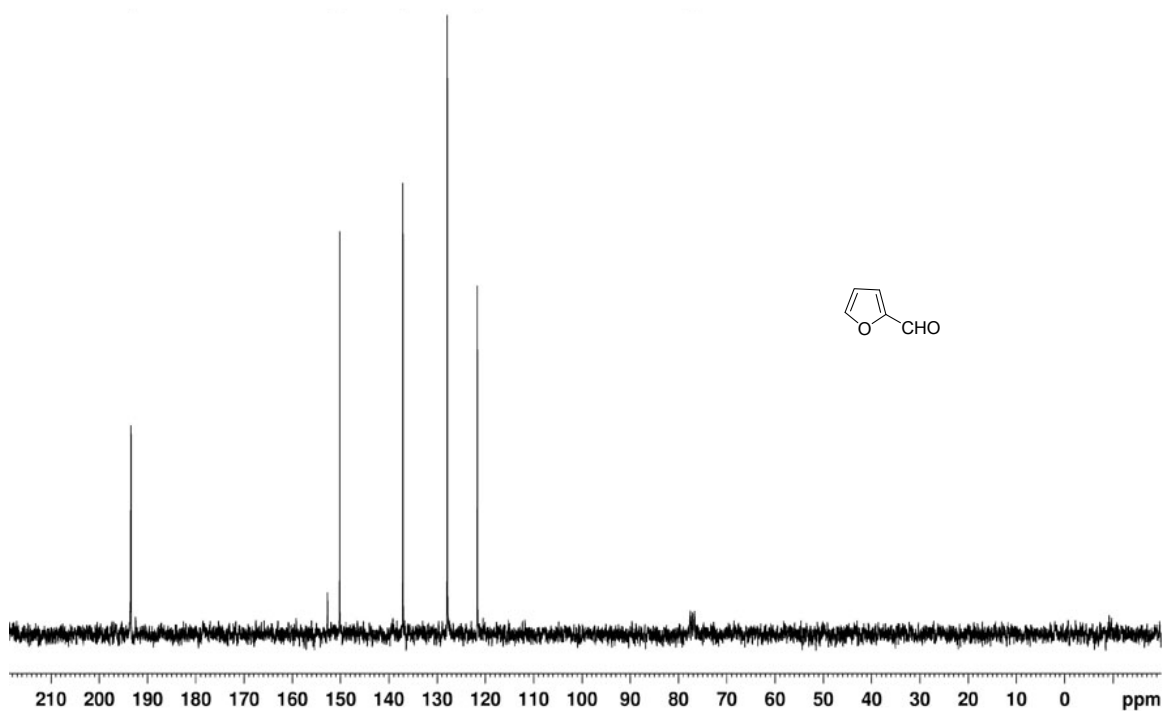

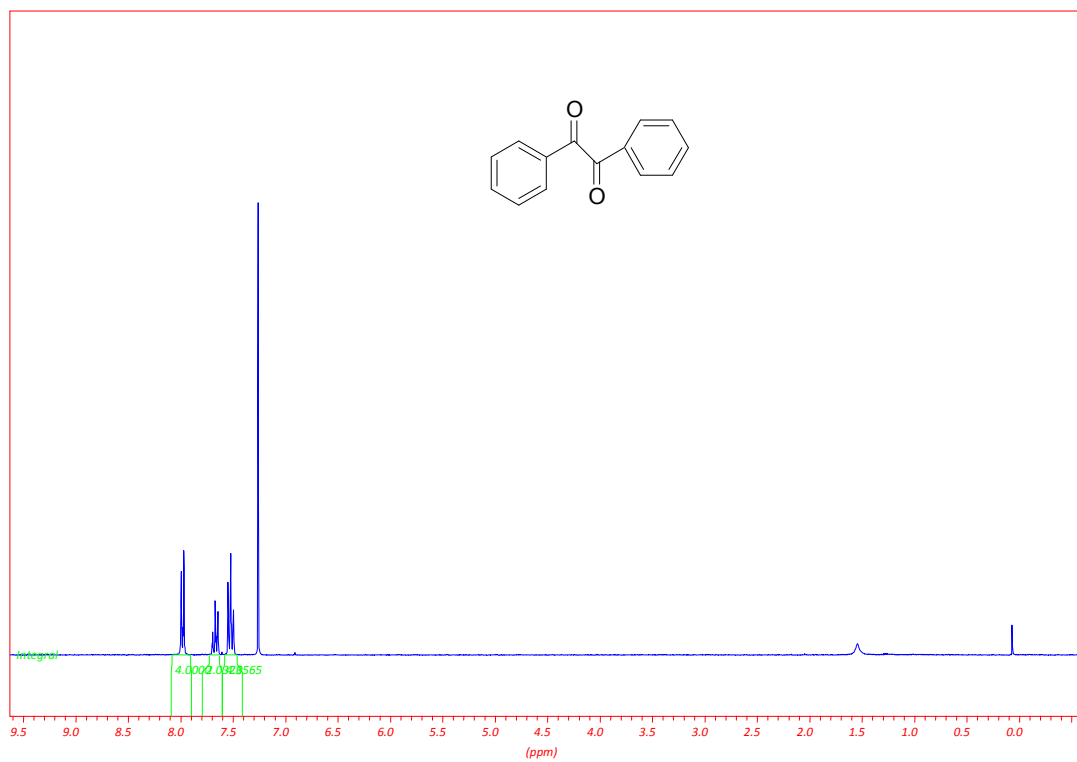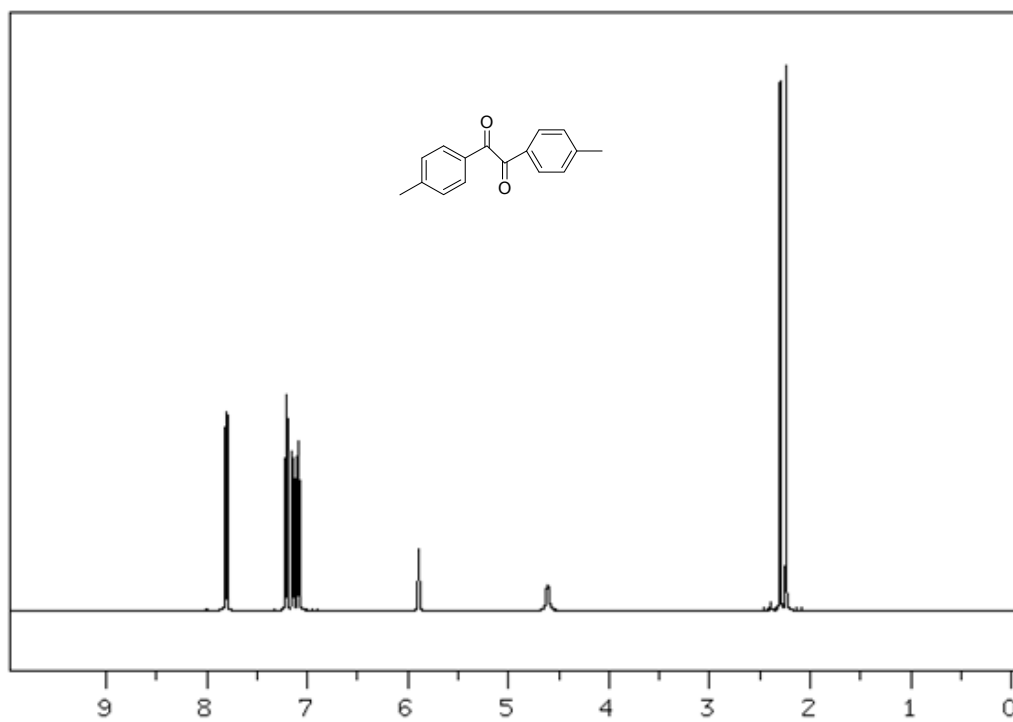

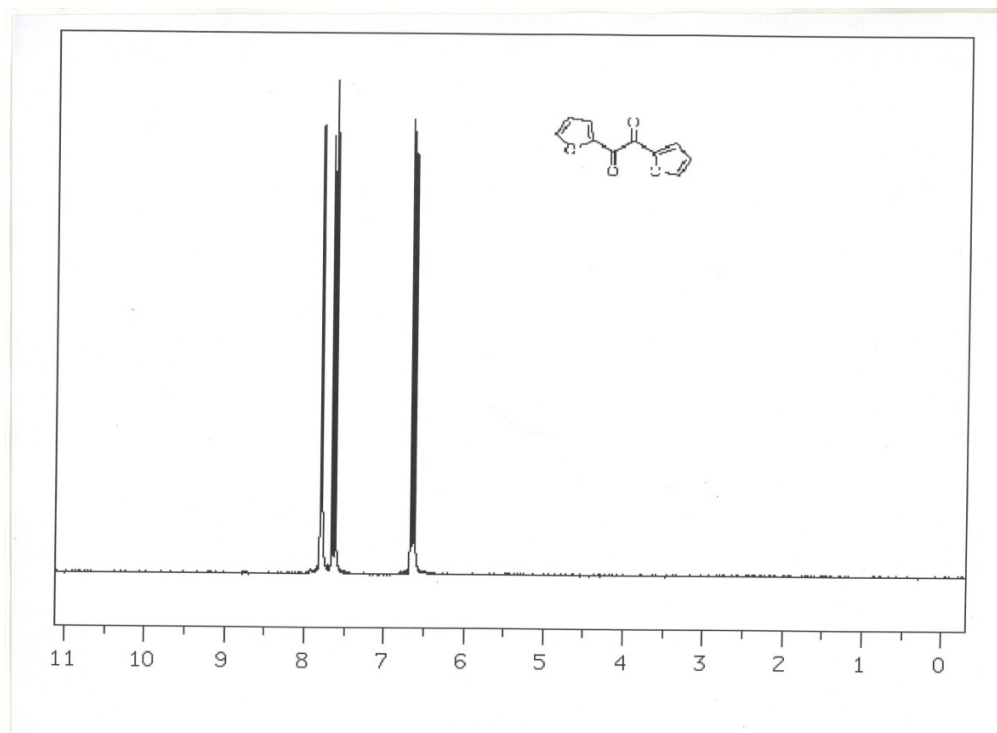

SV-151 /CDCl<sub>3</sub>  
1H NMR

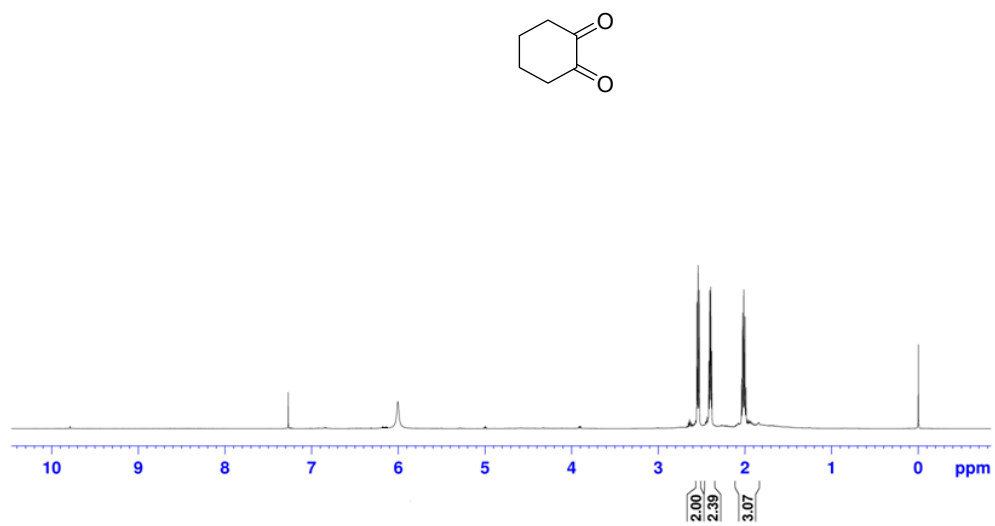

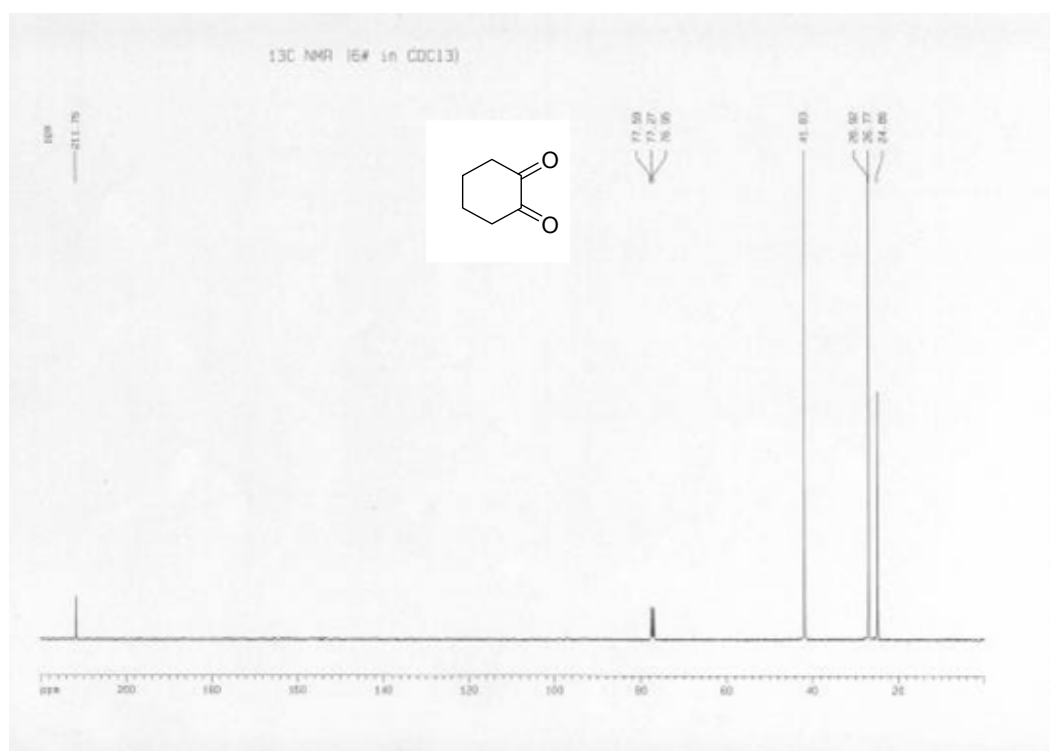

Supplement: c3ra21971b.pdf [file c3ra21971b.pdf]
